# Supplementary material for: PD-BertEDL: An Ensemble Deep Learning Method Using BERT and Multivariate Representation to Predict Peptide Detectability
Source: MDPI journal article supplement (doi:10.3390/ijms232012385), 2022-10-16
Supplement: s1 [file s1]

# PD-BertEDL: An Ensemble Deep Learning Method Using BERT and Multivariate Representation to Predict Peptide Detectability

Huiqing Wang<sup>1,\*</sup>, Juan Wang<sup>1</sup>, Zhipeng Feng<sup>1</sup>, Ying Li<sup>1</sup> and Hong Zhao<sup>1</sup>

<sup>1</sup> College of Information and Computer, Taiyuan University of Technology, Taiyuan 030024, China

\* Correspondence: wanghuiqing@tyut.edu.cn.

## Supporting Tables

**Table S1.** Amino acid properties details of 15 physicochemical information.

| category       | Amino acid properties                                                   |
|----------------|-------------------------------------------------------------------------|
| structure      | 0-alpha-CH chemical shifts                                              |
|                | 1-Helix termination parameter at position j-2, j-1, j                   |
|                | 2-Optimized propensity to form reverse turn                             |
|                | 3-Normalized frequency of alpha-helix in all-alpha class All-alpha      |
|                | 4-Correlation coefficient in regression analysis                        |
|                | 5-Weights for alpha-helix at the window position of -1                  |
|                | 6-Average relative fractional occurrence in ER(i-1)                     |
|                | 7-Relative preference value at N1                                       |
|                | 8-Normalized frequency of isolated helix                                |
| Hydrophobicity | 9-Normalized frequency of zeta R                                        |
|                | Hydrophobicity coefficient in RP-HPLC, C18 with 0.1%TFA/2-PrOH/MeCN/H2O |
| energy         | 0-Activation Gibbs energy of unfolding                                  |
|                | 1-Slopes tripeptide FDPB PARSE neutral                                  |
| charge         | Positive charge                                                         |
| AAC            | AA composition of EXT2 of single-spanning proteins                      |

**Table S2.** Amino acid properties details of 15 physicochemical information value.

| Amino acid     | str0    | str1    | str2   | str3 | str4  | str5  | str6 | str7 | str8  | str9  |
|----------------|---------|---------|--------|------|-------|-------|------|------|-------|-------|
| A              | 4.349   | 1.2     | 1.34   | 1.08 | 0.687 | 0.34  | 0.99 | 1.2  | 0.946 | 0.328 |
| C              | 4.686   | 1       | 1.07   | 1.22 | 0.263 | -0.18 | 2.32 | 0.8  | 0.481 | 0     |
| D              | 4.765   | 0.7     | 3.32   | 0.86 | 0.632 | 0.06  | 1.18 | 0.8  | 1.311 | 3.379 |
| E              | 4.295   | 0.7     | 2.2    | 1.09 | 0.669 | 0.2   | 1.36 | 2.2  | 0.698 | 0     |
| F              | 4.663   | 1       | 0.8    | 0.96 | 0.577 | 0.15  | 1.25 | 0.5  | 0.963 | 1.336 |
| G              | 3.972   | 0.8     | 2.07   | 0.85 | 0.67  | -0.88 | 1.4  | 0.3  | 0.36  | 0.5   |
| H              | 4.63    | 1.2     | 1.27   | 1.02 | 0.594 | -0.09 | 1.06 | 0.7  | 2.168 | 1.204 |
| I              | 4.224   | 0.8     | 0.66   | 0.98 | 0.564 | -0.03 | 0.81 | 0.9  | 1.283 | 2.078 |
| K              | 4.358   | 1.7     | 0.61   | 1.01 | 0.407 | -0.11 | 0.91 | 0.6  | 1.203 | 0.835 |
| L              | 4.385   | 1       | 0.54   | 1.04 | 0.541 | 0.2   | 1.26 | 0.9  | 1.192 | 0.414 |
| M              | 4.513   | 1       | 0.7    | 1.11 | 0.328 | 0.43  | 1    | 0.3  | 0     | 0.982 |
| N              | 4.755   | 1.2     | 2.49   | 1.05 | 0.489 | -0.33 | 1.15 | 0.7  | 0.432 | 1.498 |
| P              | 4.471   | 1       | 2.12   | 0.91 | 0.6   | -0.81 | 0    | 2.6  | 2.093 | 0.415 |
| Q              | 4.373   | 1       | 1.49   | 0.95 | 0.527 | 0.01  | 1.52 | 0.7  | 1.615 | 0     |
| R              | 4.396   | 1.7     | 0.95   | 0.93 | 0.59  | 0.22  | 1.19 | 0.7  | 1.128 | 2.088 |
| S              | 4.498   | 1.5     | 0.94   | 0.95 | 0.692 | -0.35 | 1.5  | 0.7  | 0.523 | 1.089 |
| T              | 4.346   | 1       | 1.09   | 1.15 | 0.713 | -0.37 | 1.18 | 0.8  | 1.961 | 1.732 |
| V              | 4.184   | 0.8     | 1.32   | 1.03 | 0.529 | 0.13  | 1.01 | 1.1  | 0.409 | 0.946 |
| W              | 4.702   | 1       | -4.65  | 1.17 | 0.632 | 0.07  | 1.33 | 2.1  | 1.925 | 1.781 |
| Y              | 4.604   | 1       | -0.17  | 0.8  | 0.495 | -0.31 | 1.09 | 1.8  | 0.802 | 0     |
| Hydrophobicity | Energy0 | Energy1 | charge | AAC  |       |       |      |      |       |       |
| A              | -2.34   | -0.729  | 18.56  | 0    | 5.04  |       |      |      |       |       |
| C              | 5.03    | -0.408  | 17.84  | 0    | 2.2   |       |      |      |       |       |
| D              | -0.48   | -0.545  | 17.94  | 0    | 5.26  |       |      |      |       |       |
| E              | 1.3     | -0.532  | 17.97  | 0    | 6.07  |       |      |      |       |       |
| F              | 2.57    | -0.454  | 17.95  | 0    | 3.72  |       |      |      |       |       |
| G              | -1.06   | -0.86   | 18.57  | 0    | 7.09  |       |      |      |       |       |
| H              | -3      | -0.519  | 18.64  | 1    | 2.99  |       |      |      |       |       |
| I              | 7.26    | -0.361  | 19.21  | 0    | 4.32  |       |      |      |       |       |
| K              | 1.56    | -0.508  | 18.36  | 1    | 6.31  |       |      |      |       |       |
| L              | 1.09    | -0.462  | 19.01  | 0    | 9.88  |       |      |      |       |       |
| M              | 0.62    | -0.518  | 18.49  | 0    | 1.85  |       |      |      |       |       |
| N              | 2.81    | -0.597  | 18.24  | 0    | 5.94  |       |      |      |       |       |
| P              | -0.15   | NA      | 18.77  | 0    | 6.22  |       |      |      |       |       |
| Q              | 0.16    | -0.492  | 18.51  | 0    | 4.5   |       |      |      |       |       |
| R              | 1.6     | -0.535  | 0      | 1    | 3.73  |       |      |      |       |       |
| S              | 1.93    | -0.278  | 18.06  | 0    | 8.05  |       |      |      |       |       |
| T              | 0.19    | -0.367  | 17.71  | 0    | 5.2   |       |      |      |       |       |
| V              | 2.06    | -0.323  | 18.98  | 0    | 6.19  |       |      |      |       |       |
| W              | 3.59    | -0.455  | 16.87  | 0    | 2.1   |       |      |      |       |       |
| Y              | -2.58   | -0.439  | 18.23  | 0    | 3.32  |       |      |      |       |       |

**Table S3.** Cross-validation mean results and independent test results of 21 classifiers on the Mus.culus dataset.

| Descriptor | Classifier <sup>a</sup> | Cross-validation     | Independent test |
|------------|-------------------------|----------------------|------------------|
|            |                         | mean_Acc±std_Acc     | Acc              |
| One-hot    | kNN                     | 0.5202±0.0052        | 0.5368           |
|            | LR                      | 0.5996±0.0097        | 0.6154           |
|            | RF                      | 0.5731±0.0037        | 0.5914           |
|            | GBDT                    | 0.6093±0.0163        | 0.6212           |
|            | CNN                     | 0.7129±0.0112        | 0.7112           |
|            | BiLSTM                  | 0.7407±0.0041        | 0.7430           |
|            | CNN+BiLSTM              | <b>0.7434±0.0046</b> | <b>0.7502</b>    |
| AP3-A      | kNN                     | 0.5377±0.0090        | 0.5500           |
|            | LR                      | 0.5960±0.0050        | 0.6041           |
|            | RF                      | 0.5593±0.0129        | 0.5773           |
|            | GBDT                    | 0.6199±0.0153        | 0.6276           |
|            | CNN                     | 0.7190±0.0106        | 0.7242           |
|            | BiLSTM                  | 0.7162±0.0079        | 0.7142           |
|            | CNN+BiLSTM              | <b>0.7336±0.0084</b> | <b>0.7331</b>    |
| BERT-mini  | kNN                     | 0.5472±0.0072        | 0.5521           |
|            | LR                      | 0.6050±0.0052        | 0.6307           |
|            | RF                      | 0.5478±0.0081        | 0.5516           |
|            | GBDT                    | 0.6059±0.0072        | 0.6217           |
|            | CNN                     | 0.6214±0.0104        | 0.6195           |
|            | BiLSTM                  | <b>0.7037±0.0081</b> | <b>0.7055</b>    |
|            | CNN+BiLSTM              | 0.6197±0.0134        | 0.6252           |

<sup>a</sup> a kNN: k-nearest neighbor, LR: logistic regression, RF: random forest, GBDT: Gradient Boosting Decision Tree. The best results for each descriptor are highlighted in bold.

**Table S4.** Cross-validation mean results and independent test results of 21 classifiers on the Homo.spaines dataset.

| Descriptor | Classifier <sup>a</sup> | Cross-validation     | Independent test |
|------------|-------------------------|----------------------|------------------|
|            |                         | mean_Acc±std_Acc     | Acc              |
| One-hot    | kNN                     | 0.5694±0.0046        | 0.5717           |
|            | LR                      | 0.6775±0.0097        | 0.6844           |
|            | RF                      | 0.7047±0.0072        | 0.7550           |
|            | GBDT                    | 0.6752±0.0061        | 0.6833           |
|            | CNN                     | 0.8037±0.0020        | 0.8009           |
|            | BiLSTM                  | 0.8141±0.0041        | 0.7920           |
|            | CNN+BiLSTM              | <b>0.8147±0.0032</b> | <b>0.8107</b>    |
| AP3-A      | kNN                     | 0.6209±0.0115        | 0.6206           |
|            | LR                      | 0.6648±0.0111        | 0.6692           |
|            | RF                      | 0.6817±0.0113        | 0.6992           |
|            | GBDT                    | 0.6848±0.0092        | 0.6944           |
|            | CNN                     | 0.7968±0.0039        | 0.7983           |
|            | BiLSTM                  | 0.7908±0.0067        | 0.7799           |
|            | CNN+BiLSTM              | <b>0.8058±0.0078</b> | <b>0.8117</b>    |
| BERT-mini  | kNN                     | 0.5896±0.0111        | 0.6087           |
|            | LR                      | 0.7185±0.0050        | 0.7428           |
|            | RF                      | 0.6275±0.0149        | 0.6148           |
|            | GBDT                    | 0.7000±0.0104        | 0.7094           |
|            | CNN                     | 0.7001±0.0243        | 0.6909           |
|            | BiLSTM                  | <b>0.7988±0.0068</b> | <b>0.8042</b>    |
|            | CNN+BiLSTM              | 0.7864±0.0098        | 0.7921           |

<sup>a</sup> kNN: k-nearest neighbor, LR: logistic regression, RF: random forest, GBDT: Gradient Boosting Decision Tree. The best results for each descriptor are highlighted in bold.

× 10<sup>-5</sup>

**Table S5.** The variance of indicators with different models.

|            | Sn                    | Sp                    | ACC                   | MCC                   | AUC                   | AUPR                  |
|------------|-----------------------|-----------------------|-----------------------|-----------------------|-----------------------|-----------------------|
| DNN        | 3.65×10 <sup>-4</sup> | 3.59×10 <sup>-4</sup> | 2.56×10 <sup>-6</sup> | 1.26×10 <sup>-5</sup> | 2.25×10 <sup>-5</sup> | 4.77×10 <sup>-5</sup> |
| CapsNet    | 6.30×10 <sup>-5</sup> | 1.53×10 <sup>-4</sup> | 2.93×10 <sup>-5</sup> | 1.07×10 <sup>-4</sup> | 1.40×10 <sup>-5</sup> | 3.08×10 <sup>-5</sup> |
| DeepMS     | 1.33×10 <sup>-4</sup> | 2.17×10 <sup>-4</sup> | 1.81×10 <sup>-5</sup> | 6.13×10 <sup>-5</sup> | 9.47×10 <sup>-6</sup> | 1.87×10 <sup>-5</sup> |
| PepFormer  | 5.66×10 <sup>-4</sup> | 1.41×10 <sup>-3</sup> | 1.29×10 <sup>-5</sup> | 1.69×10 <sup>-3</sup> | 3.76×10 <sup>-5</sup> | 7.76×10 <sup>-5</sup> |
| PD-BertEDL | 2.24×10 <sup>-4</sup> | 1.59×10 <sup>-4</sup> | 2.17×10 <sup>-5</sup> | 2.32×10 <sup>-4</sup> | 3.00×10 <sup>-5</sup> | 3.19×10 <sup>-5</sup> |

## Supporting Figures

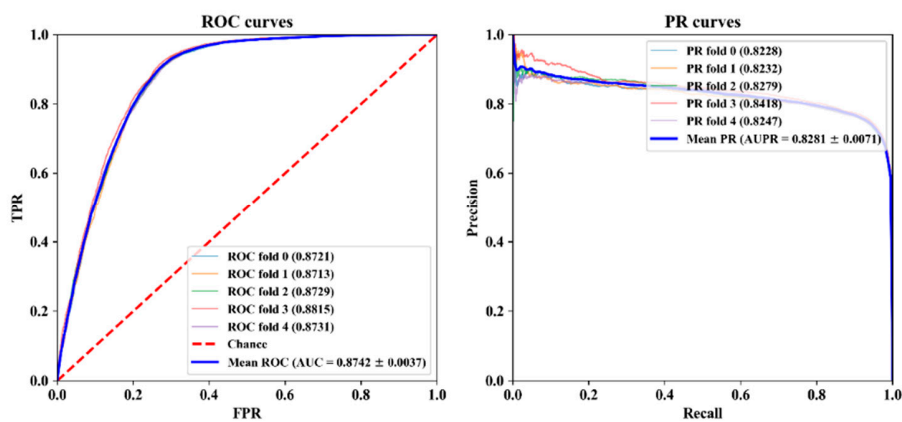

(a) AUROC and AUPR curve of sequence information-CNN+BiLSTM.

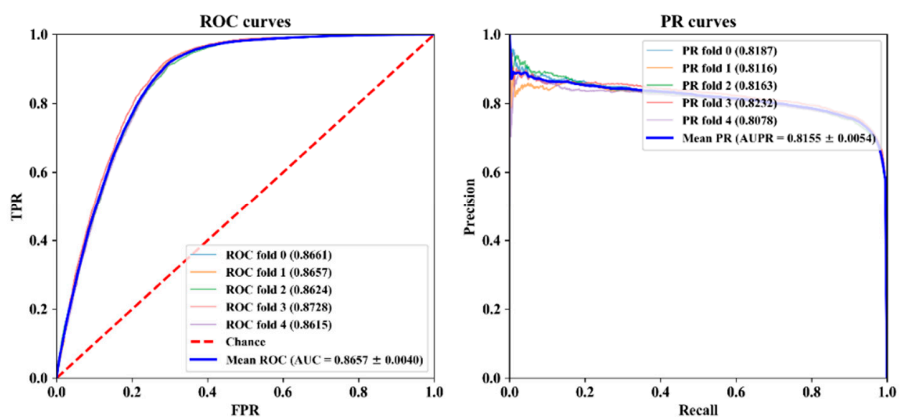

(b) AUROC and AUPR curve of physicochemical information-CNN+BiLSTM.

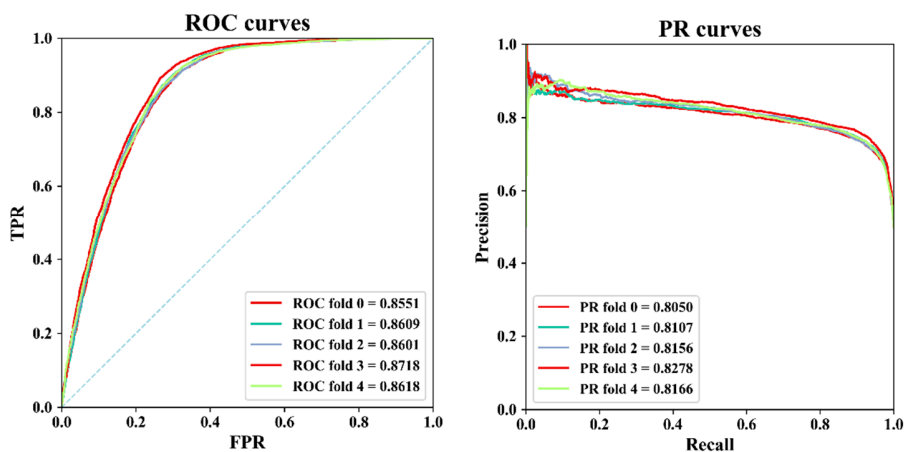

(c) AUROC and AUPR curve of context information-BiLSTM.

Figure S1. Cross-validation results of DL classifiers with three feature descriptors on the Homo.sapiens dataset.

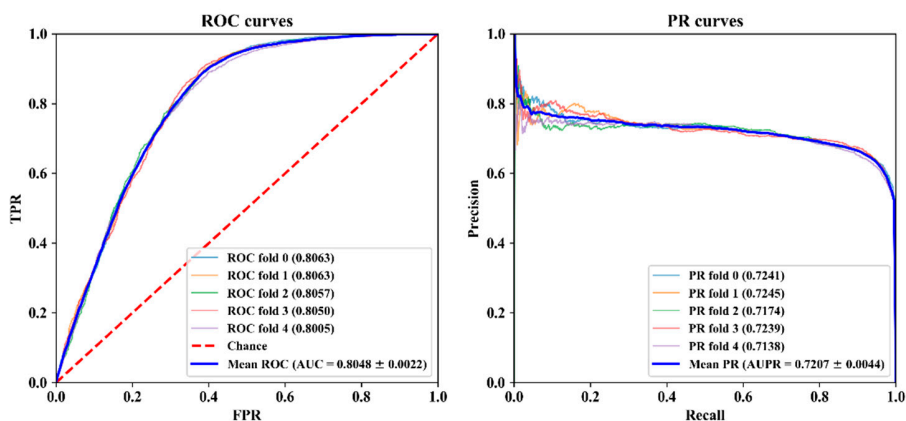

(a) AUROC and AUPR curve of sequence information-CNN+BiLSTM.

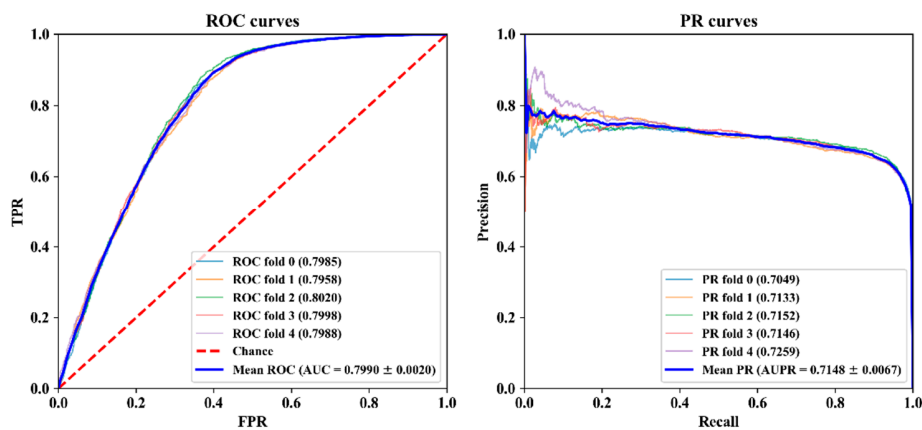

(b) AUROC and AUPR curve of physicochemical information-CNN+BiLSTM.

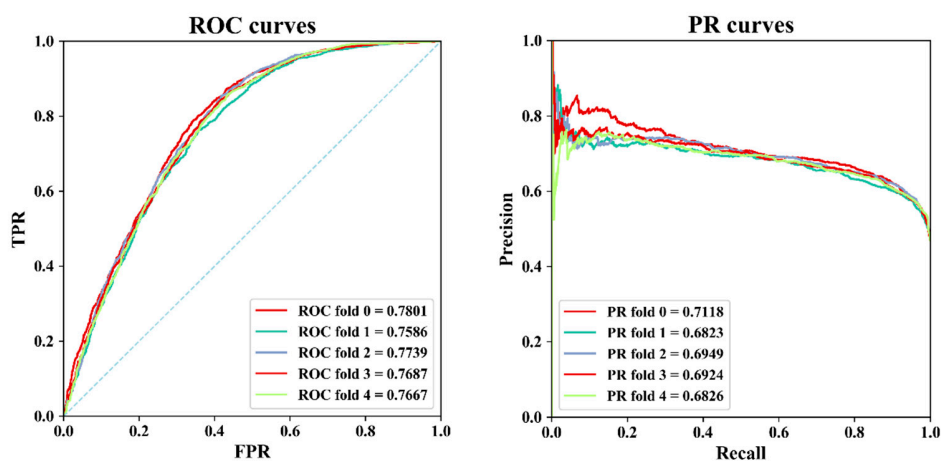

(c) AUROC and AUPR curve of context information-BiLSTM.

Figure S2. Cross-validation results of DL classifiers with three feature descriptors on the Mus.culus dataset.

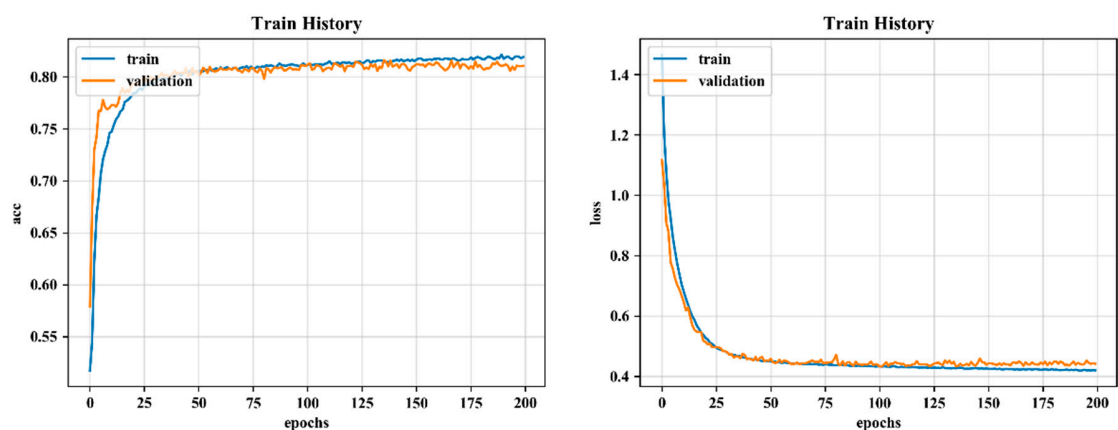

(a) Accuracy and loss curve of sequence information-CNN+BiLSTM.

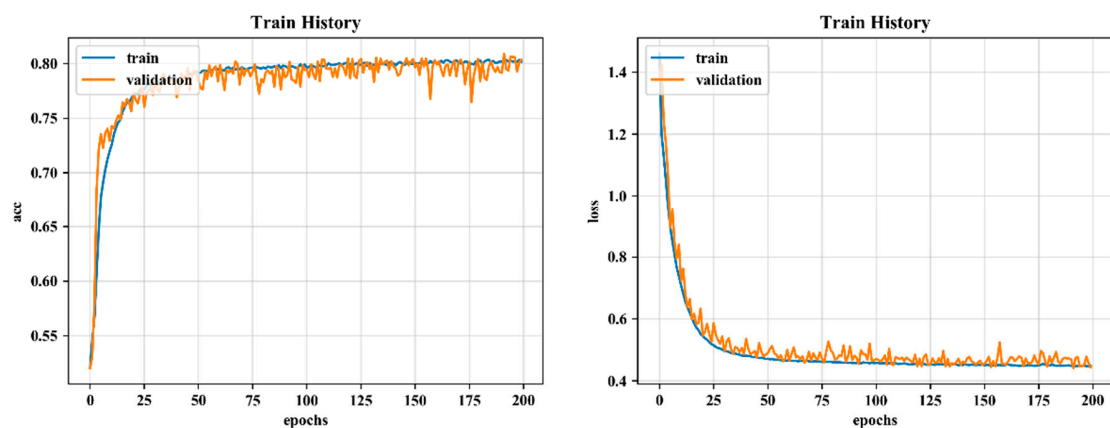

(b) Accuracy and loss curve of physicochemical information-CNN+BiLSTM.

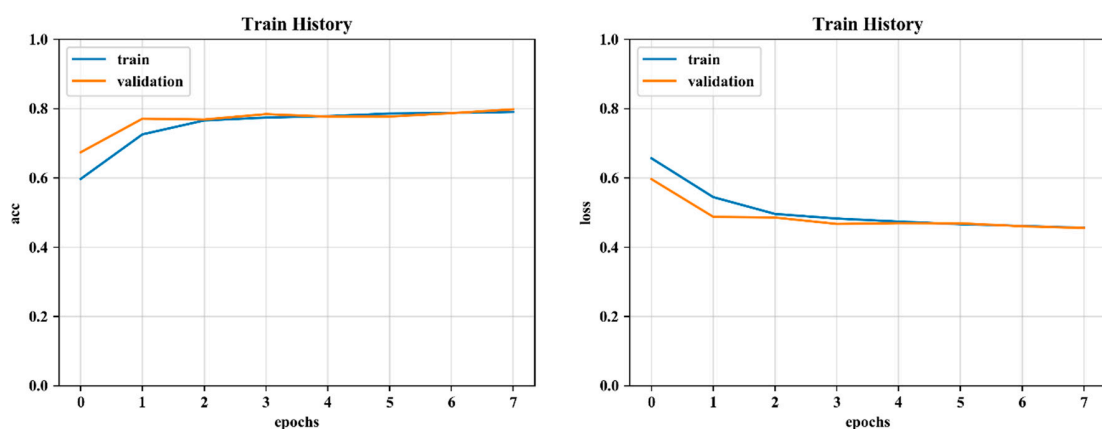

(c) Accuracy and loss curve of context information-BiLSTM.

Figure S3. Accuracy and loss of the feature1-3 on the Homo.sapiens dataset during training.

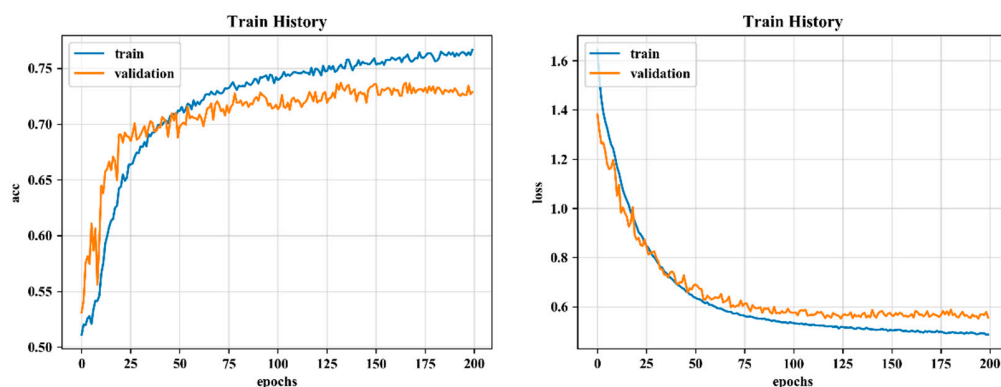

(a) Accuracy and loss curve of sequence information-CNN+BiLSTM.

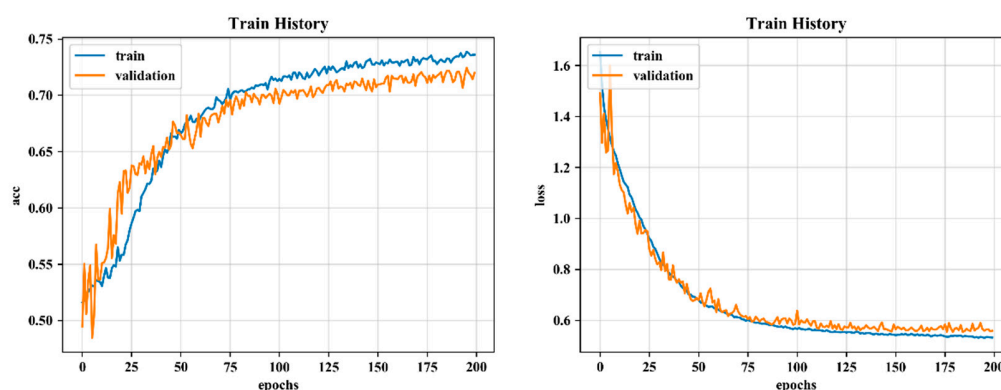

(b) Accuracy and loss curve of physicochemical information-CNN+BiLSTM.

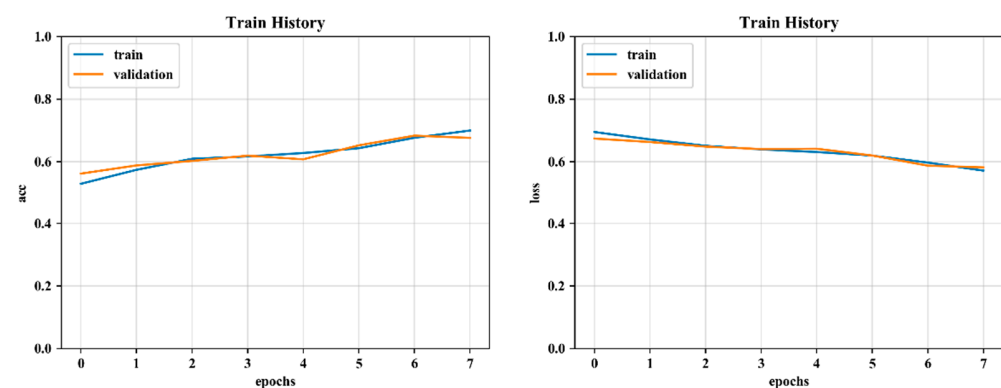

(c) Accuracy and loss curve of context information-BiLSTM.

**Figure S4.** Accuracy and loss of the feature1-3 on the Mus.culus dataset during training.
